# Supplementary material
Source: PubMed Central journal article supplement (PMC4657616)
Supplement: supp_dc15-1385v151385_DC151385SupplementaryData.pdf [file supp_dc15-1385v151385_DC151385SupplementaryData.pdf]

SUPPLEMENTARY DATA

**Supplementary Table A.** Relative decrements in mean 3MS scores over time for women grouped by diabetes status and WHI treatment assignment with covariate adjustment for baseline age and 3MS score. Mean (SE) for decrements relative to the reference group, differences in scores for women grouped by HT assignment and diabetes, [95% confidence intervals], and interaction p-values.

|                          | Hormone Therapy                  |                                  | Placebo Therapy                  |               |                                  |                                  |             |
|--------------------------|----------------------------------|----------------------------------|----------------------------------|---------------|----------------------------------|----------------------------------|-------------|
|                          | Diabetes                         | No Diabetes                      | Diabetes                         | No Diabetes   | Hormone vs Placebo Therapy       | Diabetes vs No Diabetes          | Interaction |
| Throughout 3MS follow-up |                                  |                                  |                                  |               |                                  |                                  |             |
| CEE-Alone trial          | -1.55 (0.29)<br>[-2.12 to -0.97] | -0.21 (0.13)<br>[-0.45 to 0.04]  | -0.50 (0.28)<br>[-1.05 to 0.05]  | 0.00<br>[Ref] | -0.29 (0.12)<br>[-0.52 to -0.05] | -0.90 (0.20)<br>[-1.30 to -0.50] | 0.04        |
| CEE+MPA trial            | -0.82 (0.28)<br>[-1.36 to -0.28] | -0.23 (0.09)<br>[-0.41 to -0.05] | -0.40 (0.29)<br>[-0.97 to 0.18]  | 0.00<br>[Ref] | -0.24 (0.09)<br>[-0.41 to -0.06] | -0.50 (0.20)<br>[-0.90 to -0.10] | 0.63        |
| Combined                 | -1.21 (0.20)<br>[-1.60 to -0.81] | -0.22 (0.07)<br>[-0.37 to -0.07] | -0.47 (0.20)<br>[-0.86 to -0.08] | 0.00<br>[Ref] | -0.26 (0.07)<br>[-0.40 to -0.11] | -0.72 (0.14)<br>[-0.99 to -0.44] | 0.07        |
